# Supplementary material for: Room-temperature ultrafast synthesis, morphology and upconversion luminescence of K0.3Bi0.7F2.4:Yb3+/Er3+ nanoparticles for temperature-sensing application
Source: Royal Society of Chemistry journal article supplement (doi:10.1039/d0ce01231a), 2020-01-01
Supplement: d0ce01231a1.pdf [file d0ce01231a1.pdf]

## Support Information

### **Room-temperature ultrafast synthesis, morphology and upconversion luminescent of $\text{K}_{0.3}\text{Bi}_{0.7}\text{F}_{2.4}:\text{Yb}^{3+}/\text{Er}^{3+}$ nanoparticles for temperature sensing application**

Xiaoli Gao<sup>a,b</sup>, Feng Song<sup>a,b,\*</sup>, Dandan Ju<sup>c</sup>, Aihua Zhou<sup>d</sup>, Adnan Khan<sup>a,b</sup>, Ziyu Chen<sup>a,b</sup>, Xu Sang<sup>a,b</sup>, Ming Feng<sup>a,b</sup>, and Lisa Liu<sup>a,b</sup>

Address:

*<sup>a</sup> School of Physics & The Key Laboratory of Weak Light Nonlinear Photonics, Ministry of Education, Nankai University, Tianjin, 300071, PR China*

*<sup>b</sup> Collaborative Innovation Center of Extreme Optics, Shanxi University, Taiyuan, Shanxi 030006, China*

*<sup>c</sup> School of Science, Tianjin Chengjian University, Tianjin 300384, PR China*

*<sup>d</sup> Physics Department, School of Science, Tianjin University of Science & Technology, Tianjin 300457, People's Republic of China*

\*Corresponding author. Phone: +86-22-23503620; Fax number: +86-22-23501743; E-mail address: [fsong@nankai.edu.cn](mailto:fsong@nankai.edu.cn)

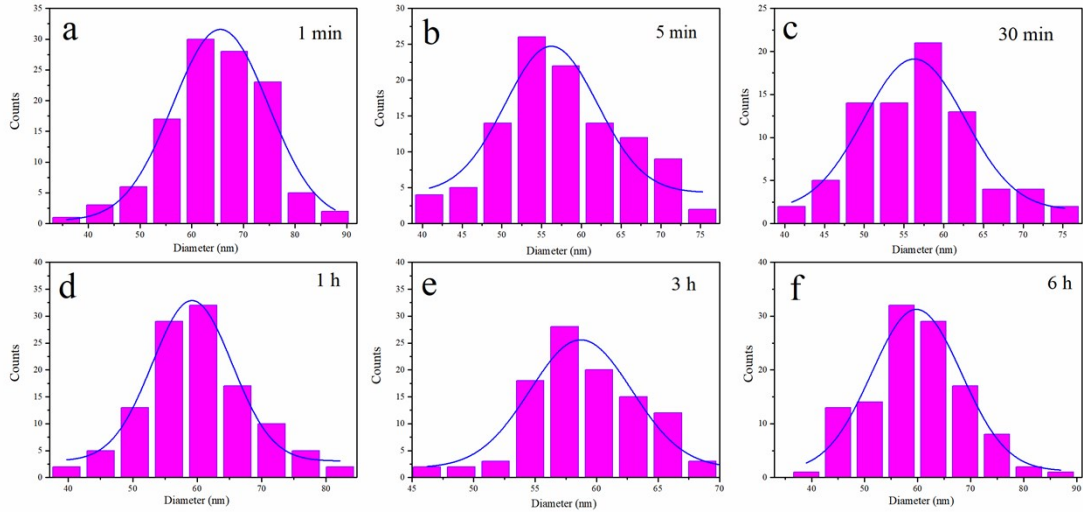

Figure S1. Size distribution of as-prepared the  $K_{0.3}Bi_{0.7}F_{2.4}$  samples at different reaction time. (a) 1 min, (b) 5 min, (c) 30 min, (d) 1 h, (e) 3 h, (f) 6 h

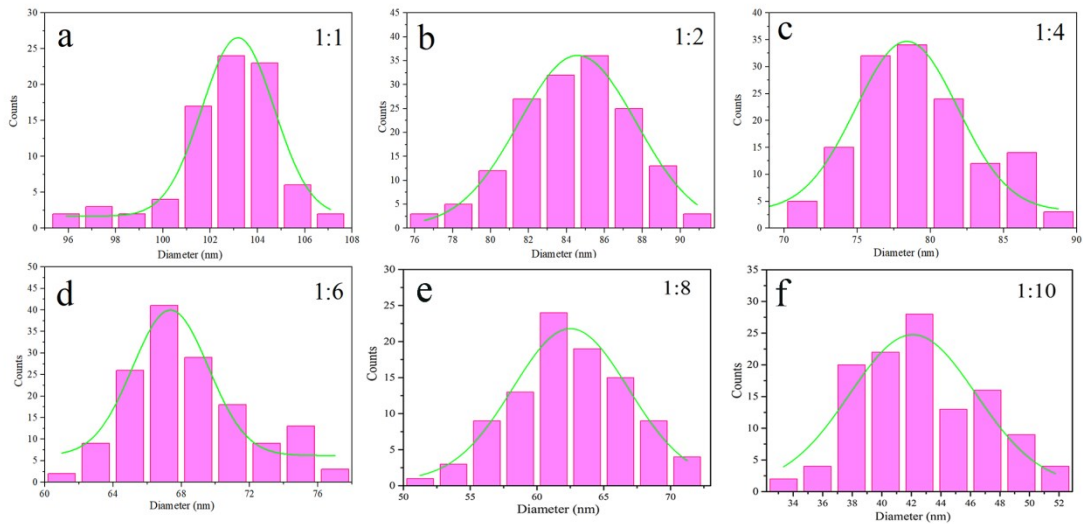

Figure S2. Size distribution of the  $K_{0.3}Bi_{0.7}F_{2.4}$  samples at different mole ratio of Bi source and  $NH_4F$ . (a)  $Bi:NH_4F=1:1$ , (b)  $Bi:NH_4F=1:2$ , (c)  $Bi:NH_4F=1:4$ , (d)  $Bi:NH_4F=1:6$ , (e)  $Bi:NH_4F=1:8$ , (f)  $Bi:NH_4F=1:10$

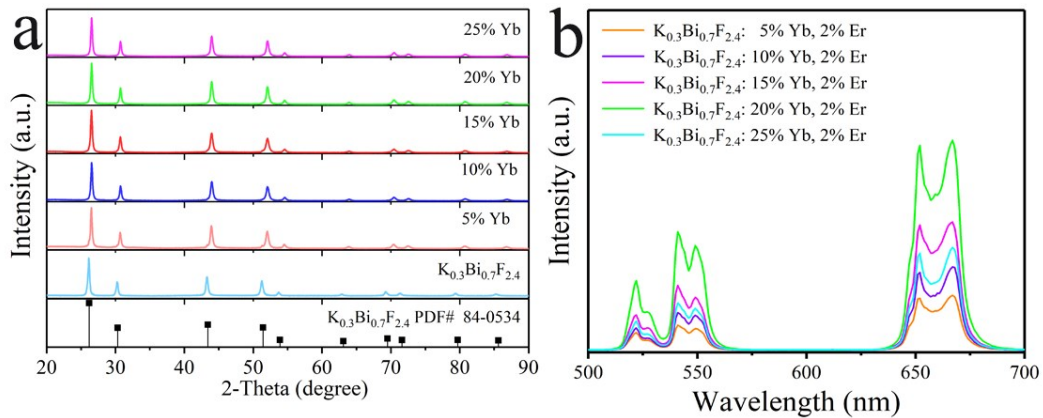

Figure S3. (a) XRD and (b) Photoluminescence emission spectra of  $K_{0.3}Bi_{0.7}F_{2.4}:xYb^{3+}, 2\%Er^{3+}$  samples. ( $x=5\%, 10\%, 15\%, 20\%, 25\%$ ) under 980 nm excitation.
